# Supplementary material for: Serotonin transporter antagonists target tumor-initiating cells in a transgenic mouse model of breast cancer
Source: PubMed Central journal article supplement (PMC5288174; doi:10.18632/oncotarget.10614), 2016-07-15
Supplement: oncotarget-07-53137-s001.pdf [file oncotarget-07-53137-s001.pdf]

## Serotonin transporter antagonists target tumor-initiating cells in a transgenic mouse model of breast cancer

### Supplementary Materials

**A**

|                   | Number of Wells with Single Cells | Number of Wells with a Single Sphere | Frequency of Wells with Spheres (%) |
|-------------------|-----------------------------------|--------------------------------------|-------------------------------------|
| 15 96-well plates | 601                               | 11                                   | 1.8                                 |
| 16 96-well plates | 336                               | 3                                    | 0.9                                 |
| 16 96-well plates | 447                               | 15                                   | 3.2                                 |
|                   |                                   |                                      | <b>Mean = 2.0</b>                   |

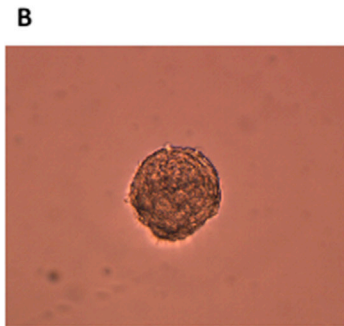

**Supplementary Figure S1: Single mouse mammary tumorsphere-derived cells form spheres.** (A) Single mouse mammary tumor cells from 3 independent mouse mammary tumors were seeded into the wells of 15 or 16 96-well plates and the number of wells with single cells identified a day later; wells seeded with tumorspheres were enumerated a week after the single cells were seeded. (B) Image of a well comprising a single tumorsphere.

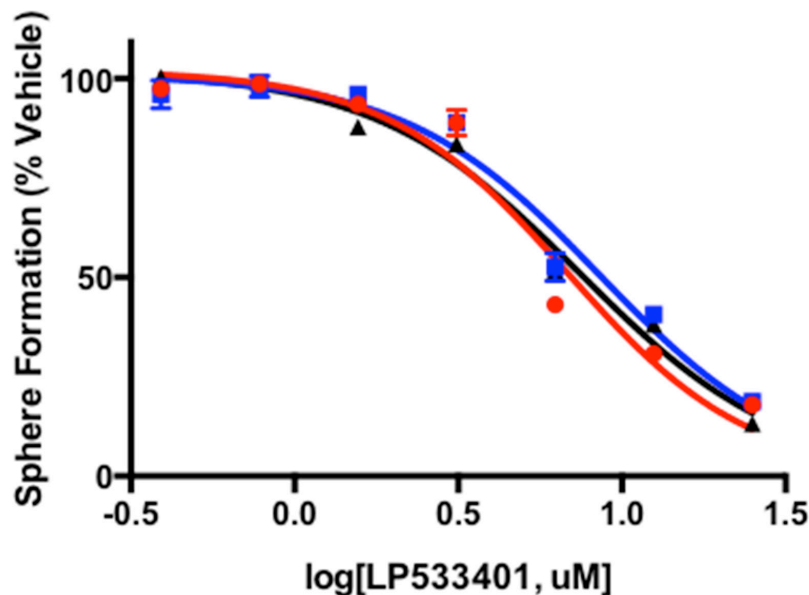

**Supplementary Figure S2: An inhibitor of TPH1 reduces sphere formation in a dose-dependent fashion.** Dilutions of LP533401 were assayed in triplicate replicates for its capacity to affect sphere formation by tumorsphere-derived cells isolated from 3 independent tumors.

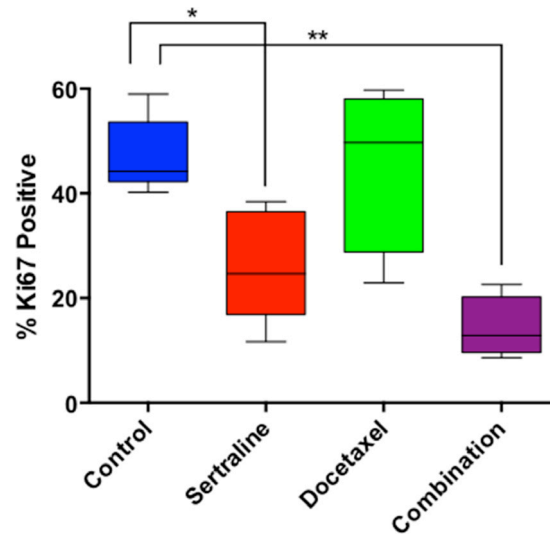

**Supplementary Figure S3: Sertraline and docetaxel synergize to reduce the fraction of Ki67-positive cells.** *P*-values were calculated using one-way ANOVA; (\*) < 0.05; (\*\*) < 0.01. *P* = 0.0009.

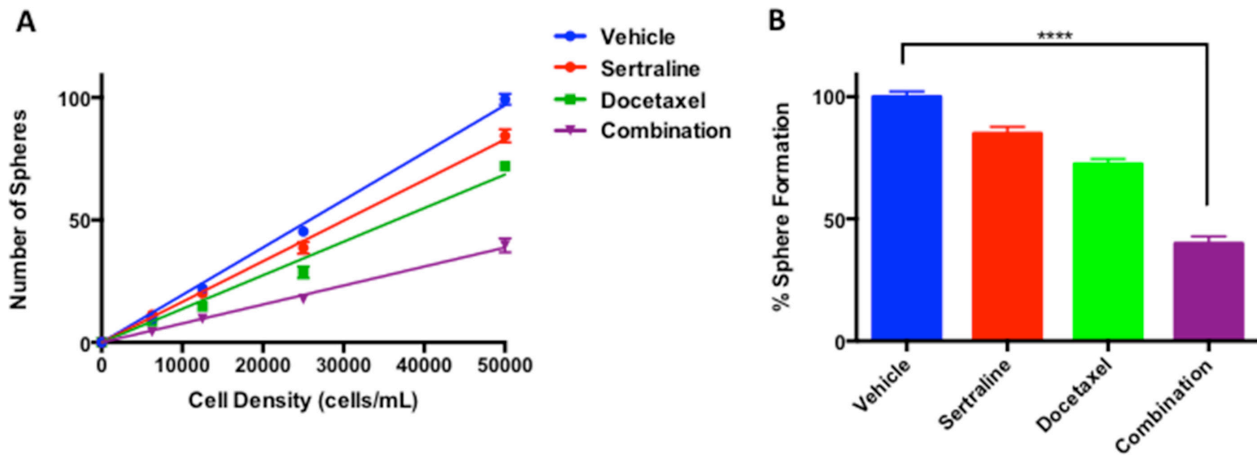

**Supplementary Figure S4: Limiting dilution tumorsphere-forming assays reveal that tumors harvested from mice administered sertraline and docetaxel comprised fewer sphere initiating cells relative to the other treatment groups.** (A and B) Frequency of tumorsphere forming cells in residual tumors remaining after treating tumor-bearing mice with the vehicle, sertraline, docetaxel, or the combination of sertraline and docetaxel. *P*-values were calculated using one-way ANOVA; (\*\*\*\*) < 0.00001.

**Supplementary Table S1: Selective antagonists of 4 different 5-HT receptors reduced the frequency of tumorsphere-forming cells**

| Selective Antagonist | 5-HT Receptor Target | IC <sub>50</sub> Prestoblue Reduction | IC <sub>50</sub> Sphere Formation |
|----------------------|----------------------|---------------------------------------|-----------------------------------|
| SB 2242489           | 1B                   | 2.8 μM                                | 0.6 μM                            |
| SB 216641            | 1B                   | 3.4 μM                                | 3.3 μM                            |
| N -Desmethylozapine  | 2C                   | 7.0 μM                                | 9.0 μM                            |
| SB 699551            | 5A                   | 0.3 μM                                | 0.5 μM                            |
| MS 245               | 6                    | 5.1 μM                                | 6.1 μM                            |

The IC<sub>50</sub> of selective 5-HT receptor antagonists was determined in sphere forming assays in triplicate at each concentration of the inhibitor.
